# Supplementary material
Source: PubMed Central journal article supplement (PMC3190967)
Supplement: NIHMS327262-supplement-01.pdf [file NIHMS327262-supplement-01.pdf]

**Supplemental Data:**

**Table 1. Differentially-expressed genes at 72hrs after light onset, rank ordered by log<sub>2</sub> difference in average fluorescence intensity between control and experimental chips (see column M).**

**Supplemental Figure 1. Housing pigmented zebrafish to intense bright fluorescent light induces photoreceptor loss followed by regeneration.**

Panels a-e illustrate Nissl-stained sections from control retina (a) and retinas exposed to bright, constant light for 24hrs (b), 72hrs (c), 10 days or (d) 10 days following by 18 days of recovery. Panels f-g illustrate quantitative measurements of the photoreceptor, outer nuclear and rod nuclear layers, respectively (see panel a), normalized to the thickness of the inner nuclear layer. Note that there is a significant decrease in the thickness of the various layers starting at 72h of light exposure. Panels i-k illustrate analysis of *rhodopsin*, *red opsin* and *PCNA* expression by quantitative real-time PCR. ROS, rod outer segments; OLM, outer limiting membrane; OPL, outer plexiform layer; IPL, inner plexiform layer; ONL, outer nuclear layer; INL, inner nuclear layer; GCL, ganglion cell layer; PL, photoreceptor layer; rod ONL, rod outer nuclear layer. Scale bar equals 50µm, \* p<0.05, \*\*p<0.01.

**Supplemental Figure 2. Sense probes do not produce specific cellular labeling.** Panels a-d illustrate *in situ* hybridizations comparing *mdka* antisense (a, c) and sense (b, d) probes. Panels a and b are from a 96hpf larva and panels

c and d are from an adult retina. Panels e-f illustrate *in situ* hybridizations comparing *mdkb* antisense (e, g) and sense (f, h) probes. Panels e and f are from a 96hpf larva, whereas panels g and h are from an adult. Arrows and arrowheads illustrate specific cellular expression when using antisense probes. GCL – ganglion cell layer; INL – inner nuclear layer; ONL – outer nuclear layer.

**Supplemental Figure 3. In the adult retina *mdka* or *mdkb* is not expressed in dividing cells.** Panels a and d illustrate *in situ* hybridizations that show the cellular expression of *mdka* and *mdkb*, respectively, in the adult retina. Panels b and e are the same sections as in a and d, following immunostaining with antibodies against PCNA, and illustrate PCNA-positive cells (rod progenitors) (arrowheads) within the outer nuclear layer. Panels c and f are digital overlays. Note that the PCNA immunostaining does not co-localize with the expression of midkines. ONL – outer nuclear layer; INL – inner nuclear layer; GCL – ganglion cell layer.

**Supplemental Figure 4. Time course of *mdka* and *mdkb* expression during and after the light lesion.** Panels a-h illustrate the time course of the injury-induced expression of *mdka*, whereas panels i-p illustrate the time course of the injury-induced expression of *mdkb*. Note that the expansion of *mdkb* expression into the vitreal inner nuclear layer begins by 24hrs after light onset (cf. panel l with Fig. 5a) and returns to normal only at 14 days after the onset of the light exposure. In contrast, the expression of *mdka* varies relatively little over the

same time course. onl, outer nuclear layer; inl inner nuclear layer; gcl, ganglion cell layer. Scale bar equals 50 $\mu$ m.

For Peer Review







|                  |                         |           |                                                                                   |                           |                              |                                             |                                                                     |        |       |
|------------------|-------------------------|-----------|-----------------------------------------------------------------------------------|---------------------------|------------------------------|---------------------------------------------|---------------------------------------------------------------------|--------|-------|
| Dr.4551.2.A1_at  | LOC591437               | --        | hypothetical LOC591437                                                            | --                        | --                           | --                                          | --                                                                  | 0.1471 | -1.12 |
| Dr.4577.1.A1_at  | wu.1b93g02              | --        | wu.1b93g02                                                                        | Transcribed sequences     | --                           | --                                          | --                                                                  | 0.7817 | -1.12 |
| Dr.15262.1.S1_at | slk381                  | zgc:55777 | serine/threonine kinase 3 similar to serine/threonine protein amino acid phospho- | --                        | --                           | --                                          | nucleotide binding // protein kinase activity // protein seri       | 0.5296 | -1.12 |
| Dr.25285.1.S1_at | zgc:73223               | zgc:73223 | hypothetical protein MGC7                                                         | --                        | --                           | --                                          | --                                                                  | 0.0720 | -1.12 |
| Dr.11205.1.S1_at | lpl1a                   | --        | triosephosphate isomerase/triosephosphate isomerase/metabolic process             | glucogenesis // glyc      | --                           | --                                          | catalytic activity // triose- triose-phosphate isomerase activity / | 0.2250 | -1.03 |
| Dr.15574.1.A1_at | hprt1l                  | --        | hypoxanthine phosphoribosyltransferase                                            | purine ribonucleoside sal | cytoplasm                    | --                                          | hypoxanthine phosphorib-                                            | 0.4472 | -1.13 |
| Dr.24454.1.S1_at | lcm5                    | --        | similar to putative tumor rRNA binding motif protein 1                            | --                        | --                           | --                                          | --                                                                  | 0.4487 | -1.13 |
| Dr.25228.1.A1_at | tom1                    | --        | target of myp1 (choiken)                                                          | Transcribed sequences     | intracellular protein trans  | --                                          | --                                                                  | 0.7548 | -1.13 |
| Dr.19215.1.S1_at | zgc:136828              | --        | Transcribed sequence with                                                         | --                        | --                           | --                                          | sulfotransferase activity /                                         | 0.4655 | -1.13 |
| Dr.5878.1.S1_at  | atp1a3b                 | --        | ATPase, Na+K+ transp                                                              | ATPase, Na+K+ transp      | transp // cation transp      | transp // potassium membrane attack complex | integrat to plasma memb                                             | 0.3558 | -1.14 |
| Dr.25318.1.A1_at | --                      | --        | Transcribed sequences                                                             | --                        | --                           | --                                          | --                                                                  | 0.3224 | -1.14 |
| Dr.16181.1.A1_at | zgc:77260               | --        | zgc:77260                                                                         | CDNA clone MGC:77260      | litranscription // transcrip | nucleus                                     | DNA binding // transcrip                                            | 0.2414 | -1.14 |
| Dr.11236.1.A1_at | --                      | --        | Transcribed locus                                                                 | Transcribed sequences     | --                           | --                                          | --                                                                  | 0.8985 | -1.14 |
| Dr.11285.1.S1_at | ywhag1                  | --        | 3-monoxygenase/hydr                                                               | CDNA clone MGC:73131      | litranscription // transcrip | cytoplasm                                   | protein domain specific b                                           | 0.8212 | -1.14 |
| Dr.11082.1.A1_at | LOC:100006450 // zgc:92 | --        | zgc:92294                                                                         | // hypothetical           | Transcribed sequence with    | --                                          | guanyl-nucleotide exch                                              | 0.5295 | -1.14 |
| Dr.11441.1.A1_at | lcm5                    | --        | tenascn R (restrictin, jan tenascn R (restrictin, janusignal transduction // ax   | --                        | --                           | --                                          | receptor binding                                                    | 0.8600 | -1.14 |
| Dr.12783.1.S1_at | LOC:559207              | --        | hypothetical LOC:559207                                                           | Transcribed sequences     | --                           | --                                          | --                                                                  | 0.5445 | -1.14 |
| Dr.25552.2.S1_at | LOC:565483              | --        | hypothetical LOC:565483                                                           | CDNA clone MGC:55996      | litranscription // transcrip | --                                          | --                                                                  | 0.5777 | -1.15 |
| Dr.11441.1.A1_at | LOC:569678              | --        | hypothetical LOC:569678                                                           | Transcribed sequence with | --                           | --                                          | --                                                                  | 0.4358 | -1.15 |
| Dr.274.1.S1_at   | pknox1                  | zgc:55328 | 6-phosphofructo-2-kinase/wu.511110                                                | fructose 2,6-bisphosphat  | fructose 2,6-bisphosphat     | nucleus                                     | catalytic activity // ATP b                                         | 0.5940 | -1.15 |
| Dr.16560.1.A1_at | epas1                   | --        | endothelial PAS domain                                                            | Transcribed sequence with | transcription // transcrip   | --                                          | DNA binding // signal tra                                           | 0.6371 | -1.15 |
| Dr.25060.1.S1_at | zgc:55492               | zgc:55492 | zgc:55492                                                                         | wu.5191c10                | protein folding              | protein folding                             | heat shock protein bindin                                           | 0.6290 | -1.15 |
| Dr.3681.1.S1_at  | LOC:798505 // nkr       | --        | natural killer-tumor recog                                                        | Transcribed sequence with | protein folding              | --                                          | peptidyl-prolyl cis-trans is                                        | 0.4064 | -1.16 |
| Dr.8425.1.A1_at  | ak5                     | --        | adenylylate kinase 5                                                              | Transcribed sequences     | --                           | --                                          | --                                                                  | 0.1880 | -1.16 |
| Dr.8000.1.S1_at  | gpx1b                   | --        | glutathione peroxidase 11                                                         | Transcribed sequence with | response to oxidative str    | --                                          | peroxidase activity // glu                                          | 0.3556 | -1.16 |
| Dr.11473.1.A1_at | zgc:92578               | --        | zgc:92578                                                                         | Transcribed sequence with | --                           | mitochondrion                               | nucleotide binding // AT                                            | 0.5448 | -1.16 |
| Dr.12931.1.A1_at | --                      | --        | Transcribed locus                                                                 | Transcribed sequences     | --                           | --                                          | --                                                                  | 0.1216 | -1.16 |
| Dr.2506.1.S1_at  | --                      | --        | Transcribed locus                                                                 | Transcribed sequence with | --                           | --                                          | --                                                                  | 0.2236 | -1.17 |

For Peer Review





|                  |            |           |                             |                            |                             |                         |         |                                                                  |        |       |
|------------------|------------|-----------|-----------------------------|----------------------------|-----------------------------|-------------------------|---------|------------------------------------------------------------------|--------|-------|
| Dr.9851.1.A1_at  | --         | --        | Transcribed locus           | Transcribed sequences      | --                          | --                      | --      | --                                                               | 0.0005 | -2.74 |
| Dr.4119.1.S1_at  | gucab1     | gucab1    | guanylate cyclase activator | guanine nucleotide binding | calcium ion transport       | --                      | --      | calcium channel activity / calcium ion binding                   | 0.0001 | -2.76 |
| Dr.20008.3.A1_at | grb1       | grb1      | guanine nucleotide binding  | signal transduction        | --                          | --                      | --      | signal transducer activity                                       | 0.0107 | -3.00 |
| Dr.12896.1.S1_at | is2b       | zgc:73382 | inhibitor of DNA binding    | zinc finger                | regulation of transcription | carbohydrate metabolism | nucleus | DNA binding // transcript DNA binding // hydrolase activity, hyd | 0.0000 | -3.00 |
| Dr.12896.2.A1_at | is2b       | zgc:73382 | inhibitor of DNA binding    | zinc finger                | regulation of transcription | carbohydrate metabolism | nucleus | DNA binding // transcript DNA binding // hydrolase activity, hyd | 0.0000 | -3.10 |
| Dr.9853.1.A1_at  | pde6a      | --        | phosphodiesterase 6A, c     | Transcribed sequence       | with signal transduction    | --                      | --      | catalytic activity // 3',5'-cyclic                               | 0.0013 | -3.24 |
| Dr.11183.1.A1_at | --         | --        | Transcribed sequences       | --                         | --                          | --                      | --      | --                                                               | 0.0001 | -3.26 |
| Dr.9912.1.A1_at  | wu:fk57g06 | --        | Transcribed sequences       | --                         | --                          | --                      | --      | --                                                               | 0.0000 | -4.08 |

For Peer Review

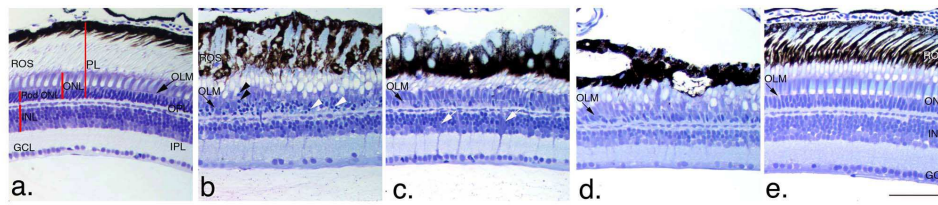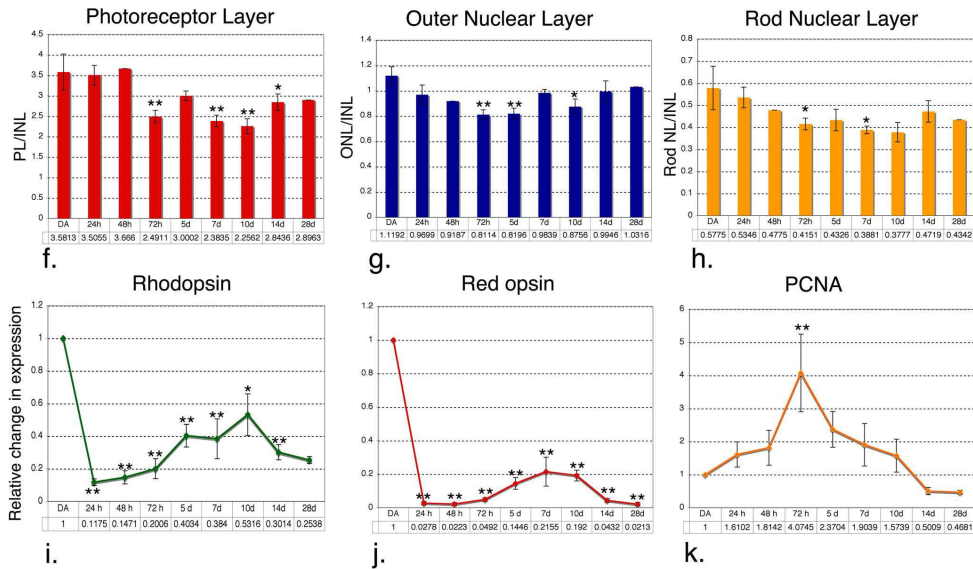

180x145mm (300 x 300 DPI)

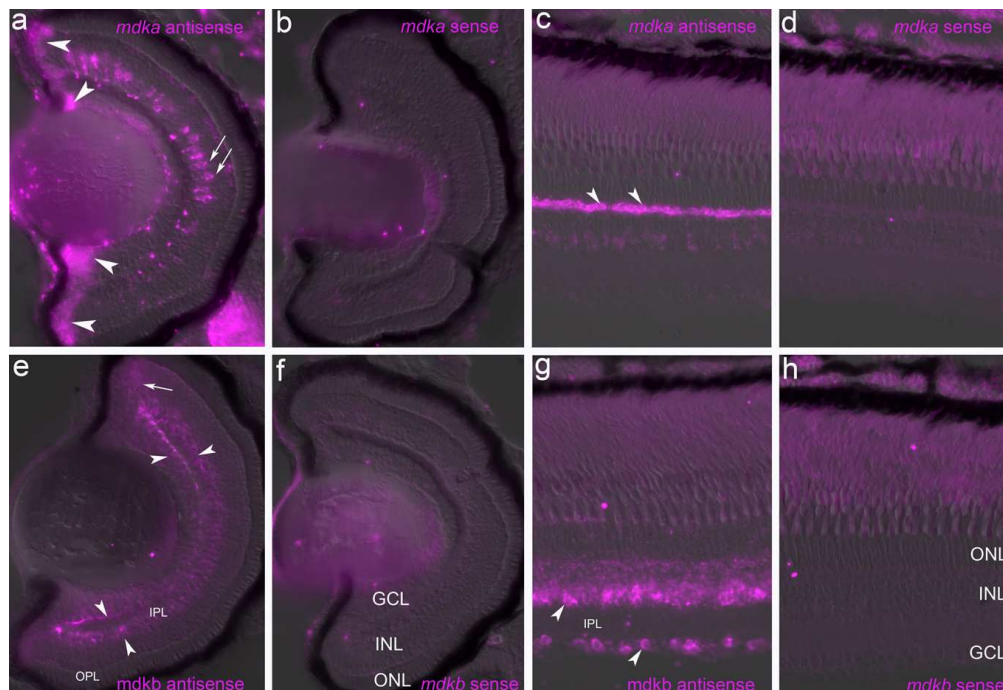

114x78mm (300 x 300 DPI)

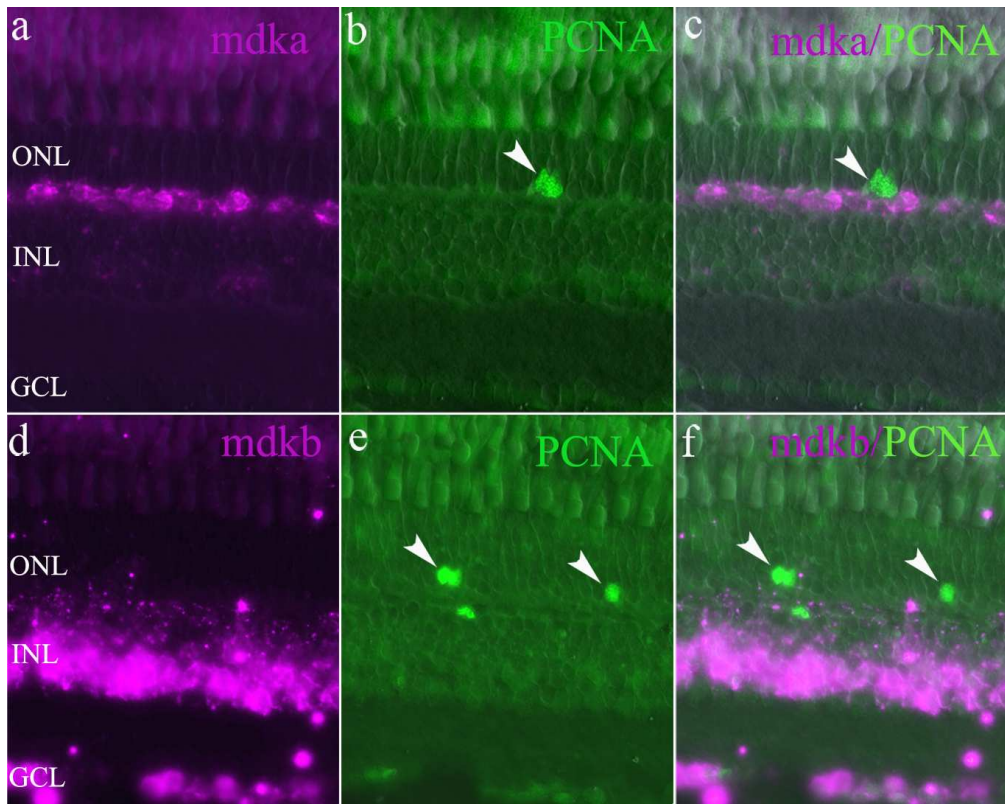

479x381mm (72 x 72 DPI)

view

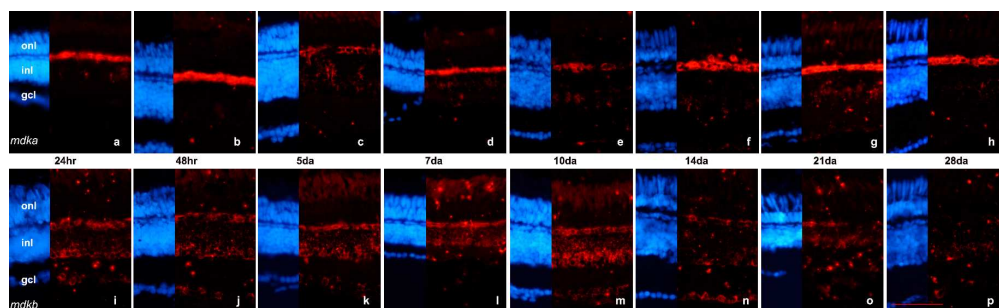

310x92mm (300 x 300 DPI)

or Peer Review
